# Supplementary material for: Comparison of Ten Metal-Doped LaFeO3 Samples on Photocatalytic Degradation of Antibiotics in Water under Visible Light: Role of Surface Area and Aqueous Phosphate Ions
Source: MDPI journal article supplement (doi:10.3390/molecules28093807), 2023-04-29
Supplement: s1 [file s1]

# Comparison of Ten Metal-Doped LaFeO<sub>3</sub> Samples on Photocatalytic Degradation of Antibiotics in Water under Visible Light: Role of Surface Area and Aqueous Phosphate Ions

Isabella Bolognino <sup>1</sup>, Renato Pelosato <sup>1</sup>, Giuseppe Marci <sup>2</sup> and Isabella Natali Sora <sup>1,\*</sup>

<sup>1</sup> Department of Engineering and Applied Sciences and INSTM, University of Bergamo, Viale Marconi 5, 24044 Dalmine, Italy; isabella.bolognino@unibg.it (I.B.); renato.pelosato@unibg.it (R.P.)

<sup>2</sup> “Schiavello Grillone” Photocatalysis Group, Department of Engineering, University of Palermo, Viale delle Scienze, 90128 Palermo, Italy; giuseppe.marci@unipa.it

\* Correspondence: isabella.natali-sora@unibg.it

## Supporting Information

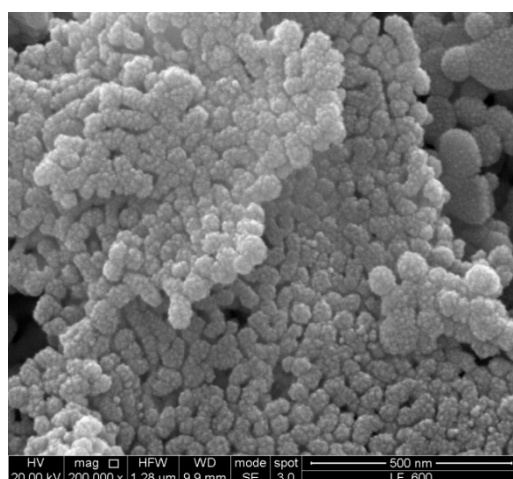

Figure S1. SEM picture of LFC10.

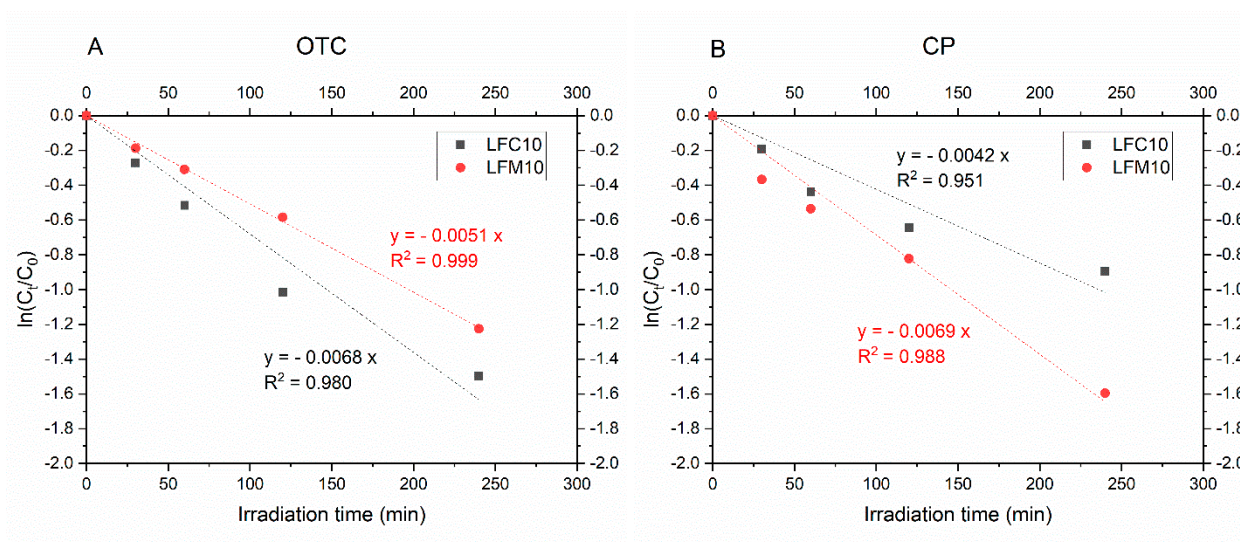

**Figure S2.** Kinetics for the photocatalytic degradation of OTC ( $5 \cdot 10^{-6}$  M) in the presence of LFC10 and LFM10 photocatalysts with the presence of  $10^{-2}$  M  $\text{H}_2\text{O}_2$ .

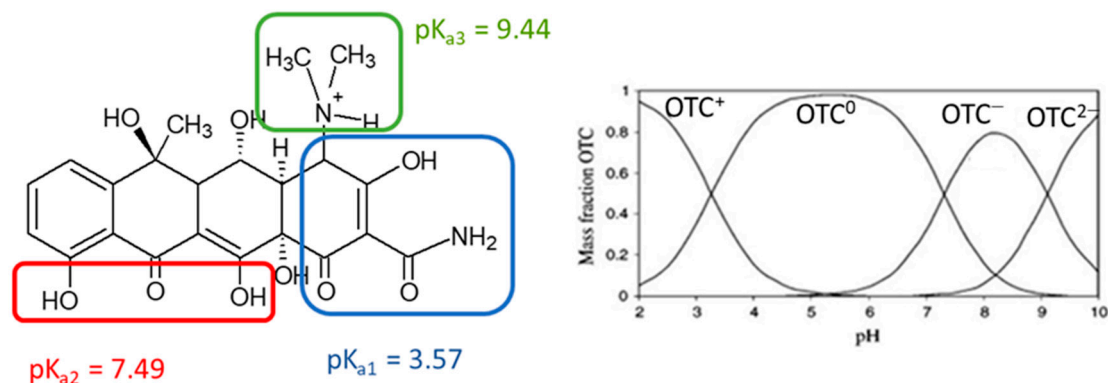

**Figure S3.** Ionization of OTC at various pH [1].

**Table S1:** Comparison of the experimental conditions for degradation of OTC. For comparison also OTC photolysis results are shown.

| Entry | Photocatalyst                                                             | Light source                | OTC concentration | Catalyst concentration | Removal % | Time (min) | $k$ ( $\text{min}^{-1}$ ) | Ref  |
|-------|---------------------------------------------------------------------------|-----------------------------|-------------------|------------------------|-----------|------------|---------------------------|------|
| 1     | (Photolysis)                                                              | UV Hg 500 W                 | 10 mg/L           | –                      | 95        | 240        | 0.0141                    | [2]  |
| 2     | Ti-MCM-41                                                                 | UV Hg 100 W                 | 50 mg/L           | 1 g/L                  | 87        | 180        | 0.012                     | [3]  |
| 3     | Graphene/TiO <sub>2</sub> /ZSM5                                           | Visible 300 W               | 10 mg/L           | 0.2 g/L                | 100       | 180        | 0.04                      | [4]  |
| 4     | Co <sub>3</sub> O <sub>4</sub> /TiO <sub>2</sub> /GO                      | (311–600 nm) Xe 300 W       | 10 mg/L           | 0.25 g/L               | 91        | 90         | 0.0272                    | [5]  |
| 5     | TiO <sub>2</sub>                                                          | Simulated solar Xe 1000 W   | 20 mg/L           | 0.5 g/L                | 100       | 40         | ?                         | [6]  |
| 6     | graphitic C <sub>3</sub> N <sub>4</sub> /NiFe <sub>2</sub> O <sub>4</sub> | Solar radiation             | 50 mg/L           | 0.5 g/L                | 97        | 60         | 0.036                     | [7]  |
| 7     | Fe <sub>2.8</sub> Ce <sub>0.2</sub> O <sub>4</sub> /GO                    | Visible 220 W               | 30 mg/L           | 0.8 g/L                | 78        | 120        | 0.0119                    | [8]  |
| 8     | 2wt% LaFeO <sub>3</sub> /g-C <sub>3</sub> N <sub>4</sub> nanosheets       | Visible light 40W white LED | 40 mg/L           | –                      | 90        | 120        | Second order              | [9]  |
| 9     | N and F doped TiO <sub>2</sub> film                                       | Visible light               | 5 mg/L            | –                      | 70        | 420        | –                         | [10] |

## References

1. Kulshrestha, P.; Giese Jr., R.F.; Aga, D.S. Investigating the Molecular Interactions of Oxytetracycline in Clay and Organic Matter: Insights on Factors Affecting Its Mobility in Soil. *Environmental Science and Technology* **2004**, *38*, 4097–4105, doi:10.1021/es034856q.
2. Jiao, S.; Zheng, S.; Yin, D.; Wang, L.; Chen, L. Aqueous Oxytetracycline Degradation and the Toxicity Change of Degradation Compounds in Photoirradiation Process. *Journal of Environmental Sciences* **2008**, *20*, 806–813, doi:10.1016/S1001-0742(08)62130-0.
3. Chen, H.; Peng, Y.-P.; Chen, K.-F.; Lai, C.-H.; Lin, Y.-C. Rapid Synthesis of Ti-MCM-41 by Microwave-Assisted Hydrothermal Method towards Photocatalytic Degradation of Oxytetracycline. *Journal of Environmental Sciences (China)* **2016**, *44*, 76–87, doi:10.1016/j.jes.2015.08.027.
4. Hu, X.-Y.; Zhou, K.; Chen, B.-Y.; Chang, C.-T. Graphene/TiO<sub>2</sub>/ZSM-5 Composites Synthesized by Mixture Design Were Used for Photocatalytic Degradation of Oxytetracycline under Visible Light: Mechanism and Biotoxicity. *Applied Surface Science* **2016**, *362*, 329–334, doi:10.1016/j.apsusc.2015.10.192.
5. Jo, W.-K.; Kumar, S.; Isaacs, M.A.; Lee, A.F.; Karthikeyan, S. Cobalt Promoted TiO<sub>2</sub>/GO for the Photocatalytic Degradation of Oxytetracycline and Congo Red. *Applied Catalysis B: Environmental* **2017**, *201*, 159–168, doi:10.1016/j.apcatb.2016.08.022.
6. Pereira, J.H.O.S.; Vilar, V.J.P.; Borges, M.T.; González, O.; Esplugas, S.; Boaventura, R.A.R. Photocatalytic Degradation of Oxytetracycline Using TiO<sub>2</sub> under Natural and Simulated Solar Radiation. *Solar Energy* **2011**, *85*, 2732–2740, doi:10.1016/j.solener.2011.08.012.
7. Sudhaik, A.; Raizada, P.; Shandilya, P.; Singh, P. Magnetically Recoverable Graphitic Carbon Nitride and NiFe<sub>2</sub>O<sub>4</sub> Based Magnetic Photocatalyst for Degradation of Oxytetracycline Antibiotic in Simulated Wastewater under Solar Light. *Journal of Environmental Chemical Engineering* **2018**, *6*, 3874–3883.
8. Hassandoost, R.; Pouran, S.R.; Khataee, A.; Orooji, Y.; Joo, S.W. Hierarchically Structured Ternary Heterojunctions Based on Ce<sup>3+</sup>/Ce<sup>4+</sup> Modified Fe<sub>3</sub>O<sub>4</sub> Nanoparticles Anchored onto Graphene Oxide Sheets as Magnetic Visible-Light-Active Photocatalysts for Decontamination of Oxytetracycline. *Journal of Hazardous Materials* **2019**, *376*, 200–211.
9. Xu, K.; Yang, X.; Ruan, L.; Qi, S.; Liu, J.; Liu, K.; Pan, S.; Feng, G.; Dai, Z.; Yang, X.; et al. Superior Adsorption and Photocatalytic Degradation Capability of Mesoporous LaFeO<sub>3</sub>/g-C<sub>3</sub>N<sub>4</sub> for Removal of Oxytetracycline. *Catalysts* **2020**, *10*.
10. Zhao, C.; Pelaez, M.; Duan, X.; Deng, H.; O'Shea, K.; Fatta-Kassinos, D.; Dionysiou, D.D. Role of pH on Photolytic and Photocatalytic Degradation of Antibiotic Oxytetracycline in Aqueous Solution under Visible/Solar Light: Kinetics and Mechanism Studies. *Applied Catalysis B: Environmental* **2013**, *134–135*, 83–92.
